# Supplementary material
Source: Springer Nature journal article supplement (https://www.springermedizin.de/resource/supplementary/12889_2012_4963_MOESM1_ESM.pdf/9490554)
Supplement: MOESM1 [file 9490554]

**Text4baby  
Delivery and  
Exposure**

Social, cultural, & physical environment  
moderate each pathway

**Health Outcomes**  
(e.g., healthy  
eating, visit  
adherence, etc.)

**Reactions/  
Receptivity to  
Messages**  
(e.g., found text  
messages useful,  
credible, etc.)

**Mediators**  
(e.g., self-efficacy to  
navigate health care  
system.)

**Behavior  
Change**  
(e.g., prenatal care  
seeking)

Process Evaluation

Outcome Evaluation
